# Supplementary material
Source: Royal Society of Chemistry journal article supplement (https://www.rsc.org/suppdata/dt/1999/3653/906198c1h.doc)
Supplement: Supplementary file 1 [file 906198c1h.doc]

1H NMR spectrum of complex **1**
